# Supplementary material for: Vapor phase aldol condensation of methyl acetate with formaldehyde over a Ba–La/Al2O3 catalyst: the stabilizing role of La and effect of acid–base properties
Source: Royal Society of Chemistry journal article supplement (doi:10.1039/c7ra10008f), 2017-01-01
Supplement: c7ra10008f1.pdf [file c7ra10008f1.pdf]

# Vapor Phase Aldol Condensation of Methyl Acetate with Formaldehyde over Ba-La/Al<sub>2</sub>O<sub>3</sub> Catalyst: The Stabilizing Role of La and Effect of Acid-Base Properties

Qiang Bao <sup>a</sup>, Wanchun Zhu<sup>a</sup>, Jianbiao Yan <sup>a,b</sup>, Chunlei Zhang <sup>b</sup>, Chunli Ning <sup>b</sup>, Yi  
Zhang <sup>b</sup>, Mengmeng Hao <sup>a</sup> and Zhenlu Wang <sup>\*,a</sup>

<sup>a</sup> Key Laboratory of Surface and Interface Chemistry of Jilin Province, College of  
Chemistry, Jilin University, Qianjin Road 2699, Changchun, 130012, PR China

<sup>b</sup> Shanghai Huayi (Group) Company Technology Research Institute, Longwu Road  
4600, Shanghai 200241, PR China

\*Corresponding authors.

Tel.: +86 431 88499140; Fax: +86 431 88499140

E-mail address: [wzl@jlu.edu.cn](mailto:wzl@jlu.edu.cn) (Z. Wang)

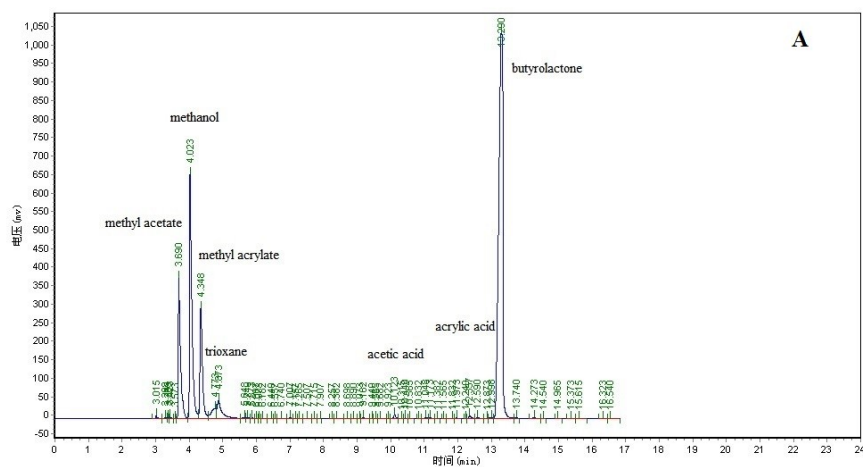

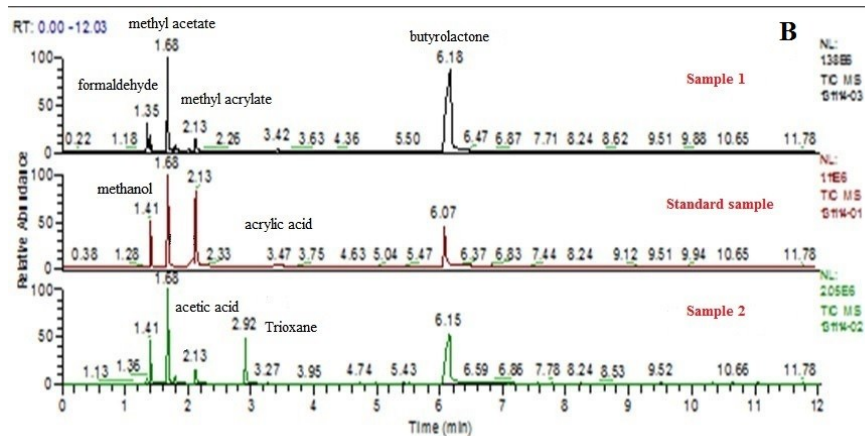

**Fig. S1** the GC data for the catalytic reaction.

A: gas chromatogram of the reaction product.

B: the mass spectra of the reaction product and the standard sample.

**Table S1** Summary of activity and selectivity of metal-modified  $\text{Al}_2\text{O}_3$  catalysts.

| Catalysts                          | Conversion (%) | Selectivity (%) |     |      | Yield (%) |
|------------------------------------|----------------|-----------------|-----|------|-----------|
|                                    |                | Ma              | MA  | AA   |           |
| $\text{Al}_2\text{O}_3$            | 34.9           | 80.0            | 5.2 | 14.8 | 27.9      |
| 5Ba/ $\text{Al}_2\text{O}_3$       | 37.9           | 93.4            | 2.0 | 4.6  | 35.4      |
| 5Ba-0.5Li/ $\text{Al}_2\text{O}_3$ | 27.6           | 94.4            | 1.4 | 4.2  | 26.0      |
| 5Ba-0.5Cs/ $\text{Al}_2\text{O}_3$ | 33.6           | 95.2            | 1.4 | 3.3  | 32.0      |
| 5Ba-0.5La/ $\text{Al}_2\text{O}_3$ | 39.5           | 93.9            | 1.7 | 4.4  | 37.0      |
| 5Ba-0.5Ce/ $\text{Al}_2\text{O}_3$ | 36.0           | 94.4            | 1.6 | 4.0  | 34.0      |
| 5Ba-0.5Zr/ $\text{Al}_2\text{O}_3$ | 38.9           | 92.7            | 2.5 | 4.8  | 36.0      |
